# Supplementary material for: Scoping Review of International Experience of a Dedicated Fund to Support Patient Access to Cancer Drugs: Policy Implications for Thailand
Source: PubMed Central journal article supplement (PMC11607595; doi:10.34172/ijhpm.2023.7768), 2024-01-28
Supplement: ijhpm-13-7768-s002.pdf [file ijhpm-13-7768-s002.pdf]

**Article title:** Scoping Review of International Experience of a Dedicated Fund to Support Patient Access to Cancer Drugs: Policy Implications for Thailand

**Journal name:** International Journal of Health Policy and Management (IJHPM)

**Authors' information:** Parnaphat Luksameesate, Osot Nerapusee, Chanthawat Patikorn, Puree Anantachoti\*

Department of Social and Administrative Pharmacy, Faculty of Pharmaceutical Sciences, Chulalongkorn University, Bangkok, Thailand.

\***Correspondence to:** Puree Anantachoti; Email: [puree.a@pharm.chula.ac.th](mailto:puree.a@pharm.chula.ac.th)

**Citation:** Luksameesate P, Nerapusee O, Patikorn C, Anantachoti P. Scoping review of international experience of a dedicated fund to support patient access to cancer drugs: policy implications for Thailand. Int J Health Policy Manag. 2024;13:7768. doi:[10.34172/ijhpm.2023.7768](https://doi.org/10.34172/ijhpm.2023.7768)

## Supplementary file 2

**Table S2 Search strategies**

| Database | Date         | Search term                                                                                                                                                                                                                                                                                                                                                                                                                                                                                                                                               | Results |
|----------|--------------|-----------------------------------------------------------------------------------------------------------------------------------------------------------------------------------------------------------------------------------------------------------------------------------------------------------------------------------------------------------------------------------------------------------------------------------------------------------------------------------------------------------------------------------------------------------|---------|
| PubMed   | May 12, 2021 | ((("cancers"[All Fields] OR "cancerated"[All Fields] OR "canceration"[All Fields] OR "cancerization"[All Fields] OR "cancerized"[All Fields] OR "cancerous"[All Fields] OR "neoplasms"[MeSH Terms] OR "neoplasms"[All Fields] OR "cancer"[All Fields] OR "cancers"[All Fields]) AND "drug"[All Fields]) OR "antineoplastic agents"[MeSH Terms]) AND ("financial management"[MeSH Terms] OR ("financial"[All Fields] AND "management"[All Fields]) OR "financial management"[All Fields] OR "fund"[All Fields])<br>Filters: Humans, from 2010 - 3000/12/12 | 2834    |
| Embase   | May 12, 2021 | ((('cancers' OR 'cancerated' OR 'canceration' OR 'cancerization' OR 'cancerized' OR 'cancerous' OR 'neoplasms' 'cancer') AND 'drug') OR 'antineoplastic agents') AND ('financial management'] OR ('financial' AND 'management' OR 'fund')<br>Filter: From 2010                                                                                                                                                                                                                                                                                            | 2019    |
